# Supplementary material for: Progression free survival of myeloma patients who become IFE-negative correlates with the detection of residual monoclonal free light chain (FLC) by mass spectrometry
Source: Research Square preprint supplement (doi:10.21203/rs.3.rs-3449333/v1), 2023-10-18
Supplement: Supplementary file 1 [file 1d75d1eb96503297cf569679.xlsx]

## Sheet: Sheet1
			Univariate analysis			Multivariate Analysis 1			Multivariate Analysis 2
		n/N	HR	95% CI	p value	HR	95% CI	p value	HR	95% CI	p value
	Post Induction
	FLC-MS positive	47/135	2.68	1.51-4.77	<0.001	4.45	1.64-12.02	0.003	4.48	1.65-12.18	0.003
	MRD positive	19/68	3.96	1.63-9.59	0.002	2.65	1.05-6.68	0.039	3.24	1.19-9.93	0.022
	Age	135/135	1.03	1.00-1.07	0.068				1.04	0.97-1.11	0.28
	ISS 2/3	66/133	0.9	0.51-1.60	0.72
	Non-IgG	77/135	1.29	0.72-2.30	0.4
	abnormal sFLC ratio	32/135	1.55	0.83-2.89	0.17
	Day+100 post ASCT
	FLC-MS positive	41/150	2.59	1.41-4.75	0.002	2.64	1.30-5.38	0.008	2.44	1.18-5.02	0.016
	MRD positive	17/112	2.74	1.27-5.93	0.01	2.33	1.07-5.11	0.034	2.77	1.23-6.24	0.014
	Age	150/150	1.03	0.99-1.07	0.08	NI			1.05	1.00-1.10	0.049
	ISS 2/3	80/150	1.31	0.71-2.40	0.38	NI			NI
	Non-IgG	69/150	1.04	0.57-1.90	0.91	NI			NI
	abnormal sFLC ratio	36/150	1.254	0.64-2.44	0.51	NI			NI
	Post Maintenance
	FLC-MS positive	18/86	3.27	1.33-8.07	0.01	NI			NI
	MRD positive	6/33	4.14	1.01-16.75	0.049	NI			NI
	Age	86/86	1.03	0.98-1.08	0.285	NI			NI
	ISS 2/3	43/85	0.88	0.37-2.07	0.76	NI			NI
	Non-IgG	33/86	1.19	0.50-2.83	0.694	NI			NI
	abnormal sFLC ratio	14/68	0.66	0.18-2.33	0.513	NI			NI
