# Supplementary material for: Progression free survival of myeloma patients who become IFE-negative correlates with the detection of residual monoclonal free light chain (FLC) by mass spectrometry
Source: Research Square preprint supplement (doi:10.21203/rs.3.rs-3449333/v1), 2023-10-18
Supplement: Supplementary file 2 [file b1b9d14096eebfa137198e51.xlsx]

## Sheet: Sheet1
		Baseline Characteristics
	Age <65 years, n (%)	161/222 (72.5%)
	Monoclonal protein isotype
	IgG, n (%)	112/222 (50.5%)
	IgA, n (%)	64/222 (28.8%)
	FLC only, n (%)	43/222 (19.4%)
	Other, n (%)	3/222 (1.4%)
	Monoclonal protein level (g/L), median (range)	30.5 (0.27-101.7)
	Involved Light Chain Isotype
	Kappa, n (%)	140/222 (63.1%)
	Lambda, n (%)	82/222 (36.9%)
	Abnormal serum FLC ratio	215/222 (96.8%)
	missing, n (%)	2/222 (0.9%)
	Serum FLC ratio >10	186/222 (83.8%)
	missing, n (%)	2/222 (0.9%)
	involved FLC (mg/L), median (range)	434.9 (0.37-40347)
	Serum creatinine (µmol/L), median (range)	89 (43-315)
	Received high dose melphalan ASCT
	Yes, n (%)	259/293 (88.4%)
	No, n (%)	34/293 (11.6%)
	Maintenance randomisation
	Lenalidomide, n (%)	153/293 (52.2%)
	Observation, n (%)	74/293 (25.3%)
	Not randomised, n (%)	66/293 (22.5%)
